# Supplementary material for: The FOXP1-ABCG2 axis promotes the proliferation of cancer stem cells and induces chemoresistance in pancreatic cancer
Source: Springer Nature journal article supplement (doi:10.1038/s41417-025-00896-7), 2025-04-01
Supplement: MOESM2 [file 41417_2025_896_MOESM2_ESM.pdf]

## Supplementary Figures

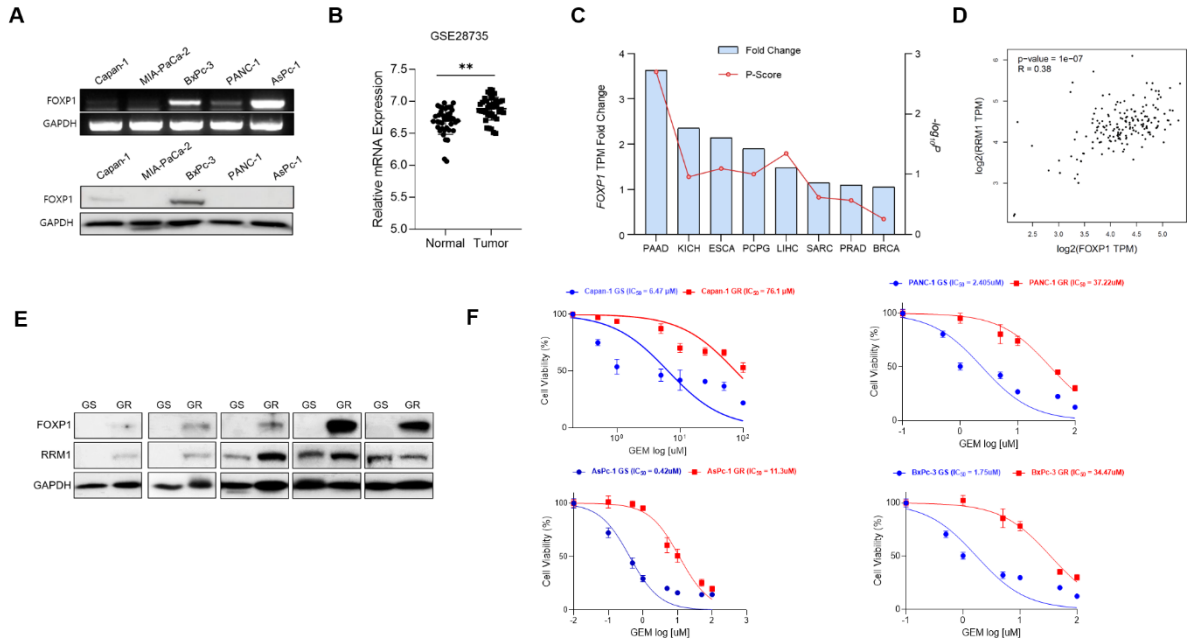

**Figure S1. FOXP1 is upregulated in gemcitabine-resistant (GR) PDAC.** (A) FOXP1 mRNA and protein expression in PDAC cell lines analyzed via RT-PCR and Western blot. (B) Differential gene expression analysis from the GSE28735 dataset reveals higher expression of FOXP1 in tumor samples compared to normal tissues (N=40, T=40) (C) Comparative analyses of FOXP1 expression levels across various cancer types (PAAD: Pancreatic Adenocarcinoma; KICH: Kidney Chromophobe; ESCA: Esophageal Carcinoma; PCPG: Pheochromocytoma and Paraganglioma; LIHC: Liver Hepatocellular Carcinoma; SARC: Sarcoma; PRAD: Prostate Adenocarcinoma; BRCA: Breast Cancer) (D) Correlation analysis between FOXP1 and RRM1 mRNA levels in the TCGA–PAAD dataset ( $R = 0.38$ ,  $p = 1e-07$ ). (E) Western blot analysis of FOXP1 and RRM1 protein levels in gemcitabine-sensitive (GS) and gemcitabine-resistant (GR) patient tumor samples. (F) Dose-response curves showing the effect of gemcitabine (GEM) treatment on cell viability (%) in GS and GR PDAC cell lines.

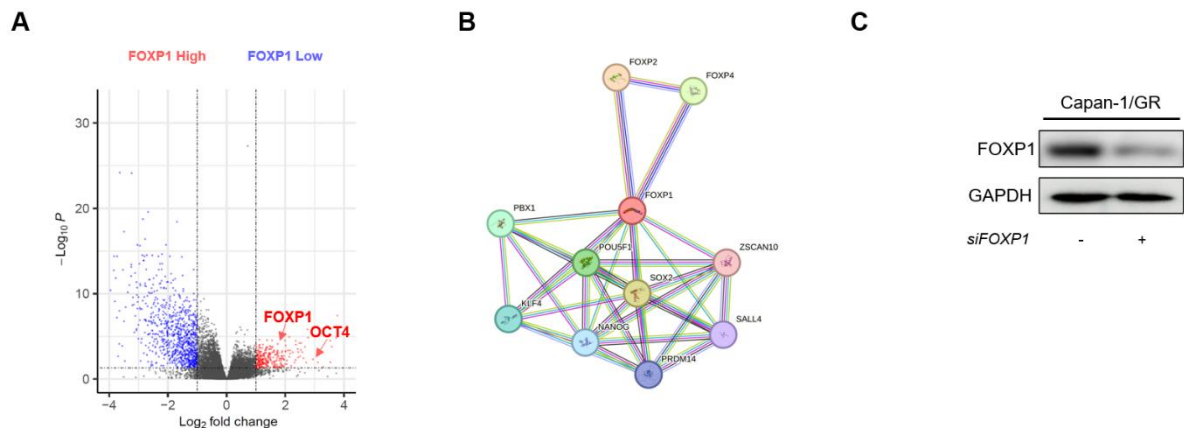

**Figure S2. FOXP1 promotes the proliferation of CSCs in GR PDAC. (A)** Volcano plot showing differential gene expressions in TCGA-PAAD samples with high versus low FOXP1 expressions. **(B)** STRING protein-protein interaction network analysis of FOXP1. **(C)** The protein expression of FOXP1 after siRNA-mediated knockdown of FOXP1 (siFOX P1).

**A**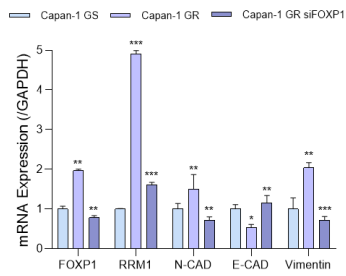

**Figure S3. FOXP1 enhances EMT and induces proliferation in GR PDAC. (A)** qRT-PCR analysis of mRNA expression levels for FOXP1, RRM1, N-cadherin (N-CAD), E-cadherin (E-CAD), and Vimentin in GS, GR, and KD cells. GAPDH was used as the normalization control. \* $p < 0.05$ , \*\* $p < 0.01$ , \*\*\* $p < 0.001$ .

**A**

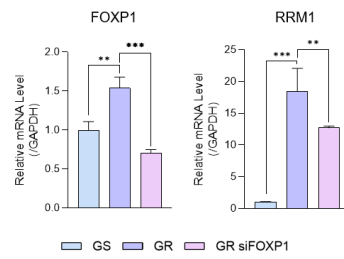

**Figure S4. FOXP1 induces metabolic reprogramming by promoting glycolysis. (A)** qRT-PCR analysis of mRNA expressions of FOXP1 and RRM1. GAPDH was used as the normalization control.

\*\*p < 0.01, \*\*\*p < 0.001.

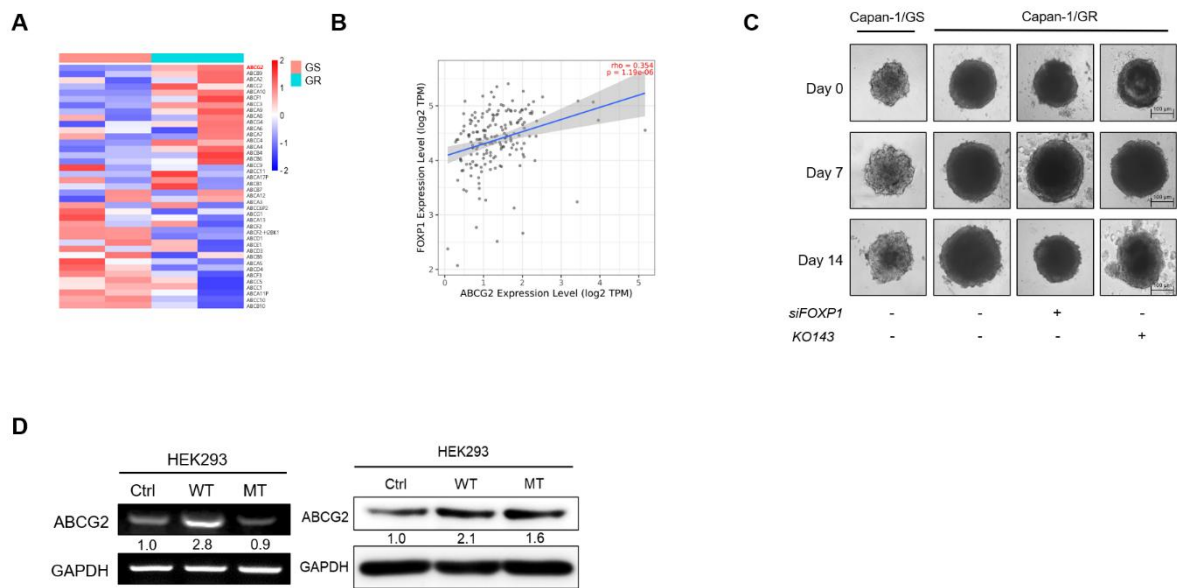

**Figure S5. FOXP1 chemosensitizes PDAC to gemcitabine by upregulating ABCG2.** **(A)** Heatmap of ABC transporter gene expression in GS and GR cells. **(B)** Correlation analysis between FOXP1 and ABCG2 mRNA levels in TCGA-PAAD ( $\rho = 0.354$ ,  $p = 1.19 \times 10^{-6}$ ). **(C)** Relative images of Capan-1 GS and GR spheres treated with siFOXP1 or KO143. **(D)** mRNA and protein expression of ABCG2 in HEK293 cells transfected with wild-type (WT) or mutant (MT) FOXP1.

**A**

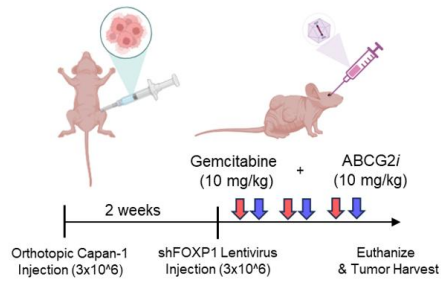

**Figure S6. Reduced FOXP1 and ABCG2 expressions lead to reduced tumor growth and increased chemosensitivity in mouse models. (A)** Schematic of the orthotopic mouse model. Orthotopic injection of Capan-1 cells was followed by shFOXP1 lentivirus injection after 2 weeks. Gemcitabine (10 mg/kg) and ABCG2 inhibitor (10 mg/kg) treatments were administered prior to tumor harvest.
